# Supplementary material for: Inhibition of SUMOylation enhances DNA hypomethylating drug efficacy to reduce outgrowth of hematopoietic malignancies
Source: PubMed Central journal article supplement (PMC10079526; doi:10.1038/s41375-023-01838-8), 2023-02-15
Supplement: 41375_2023_1838_MOESM1_ESM.pdf [file 41375_2023_1838_MOESM1_ESM.pdf]

## Supplement

# Inhibition of SUMOylation enhances DNA hypomethylating drug efficacy to reduce outgrowth of hematopoietic malignancies

Jessie S. Kroonen<sup>1</sup>, Ilona J. de Graaf<sup>1</sup>, Sumit Kumar<sup>1</sup>, Dennis F.G. Remst<sup>2</sup>, Anne K. Wouters<sup>2</sup>, Mirjam H.M. Heemskerk<sup>2</sup>, Alfred C.O. Vertegaal<sup>1#</sup>

<sup>1</sup>*Department of Chemical and Cell Biology, Leiden University Medical Centre, Leiden, The Netherlands*

<sup>2</sup>*Department of Hematology, Leiden University Medical Centre, Leiden, The Netherlands*

#Corresponding author: [vertegaal@lumc.nl](mailto:vertegaal@lumc.nl)

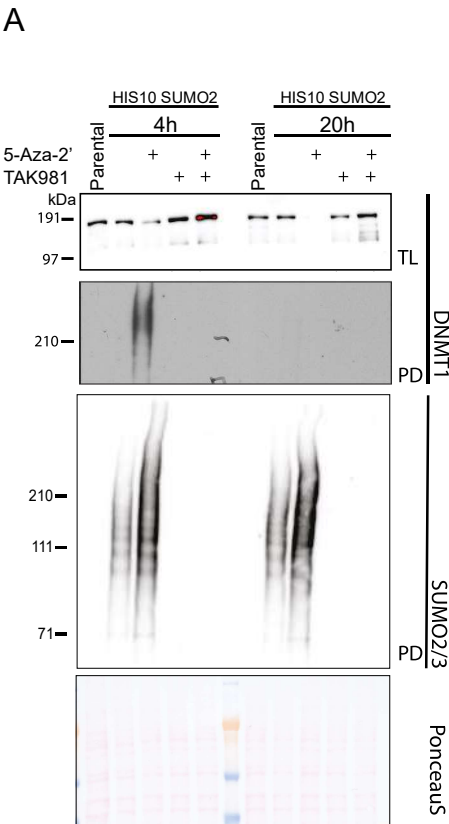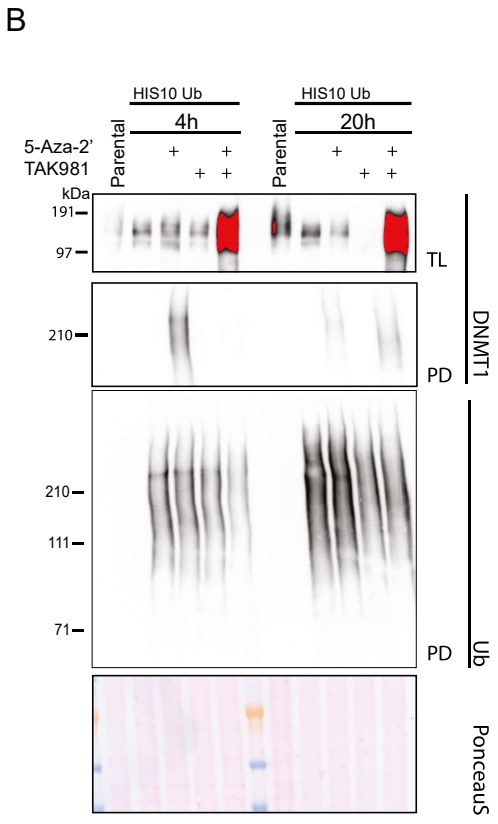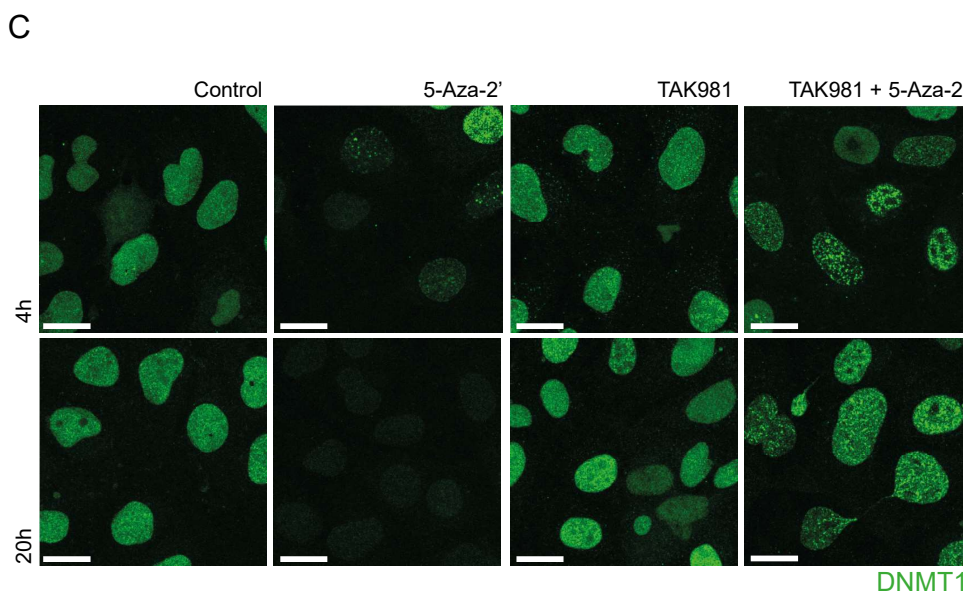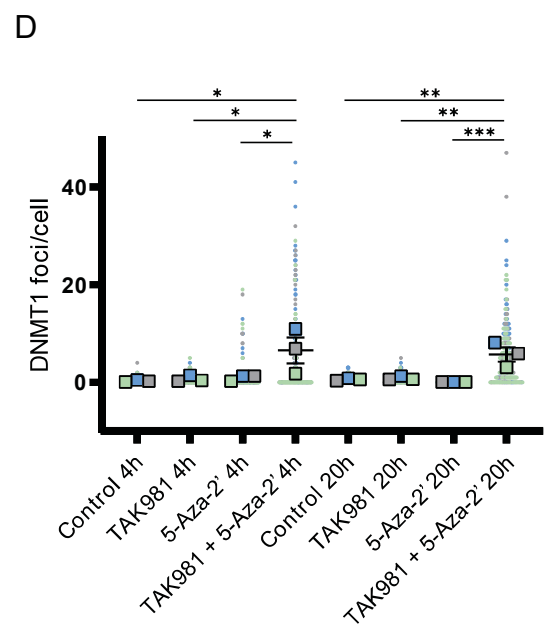

Figure S1

**Supplementary Figure 1** SUMOylation inhibition rescues DNMT1 degradation upon 5-Aza-2' treatment and contributes to prolonged presence of DNMT1 in foci in U2OS. **A & B** Show Ni-NTA pulldown of His10-SUMO2 and His10-ubiquitin respectively. Parental U2OS cells and U2OS cells stably expressing His10-SUMO2 or His10-ubiquitin were treated for 4 or 20 hour with 1  $\mu$ M 5-Aza-2' and/or 1  $\mu$ M TAK981 or DMSO 0.1% as control. Total lysate (TL) and elutions from His10 pulldowns (PD) were analyzed by immunoblotting using antibodies directed against DNMT1, SUMO2/3 or ubiquitin. Equal loading was verified with Ponceau S staining. **C** DNMT1 foci visualized by confocal microscopy. U2OS cells were treated for 4 or 20 hour with 1  $\mu$ M 5-Aza-2' and/or 1  $\mu$ M TAK981 or DMSO 0.1% as control on glass coverslips. Representative images are depicted. Scale bar represents 20  $\mu$ m. **D** Graph depicts DNMT1 foci quantification of images from **C**. Dots represent numbers of DNMT1 foci/cell using ~100 cells per replicate (n=3) \*  $\leq 0.05$ , \*\* $\leq 0.01$ , \*\*\* $\leq 0.001$ .

A

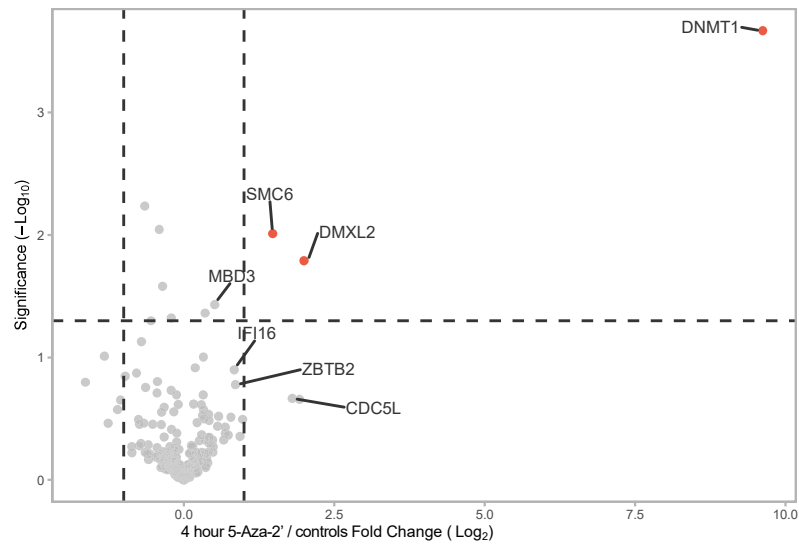

B

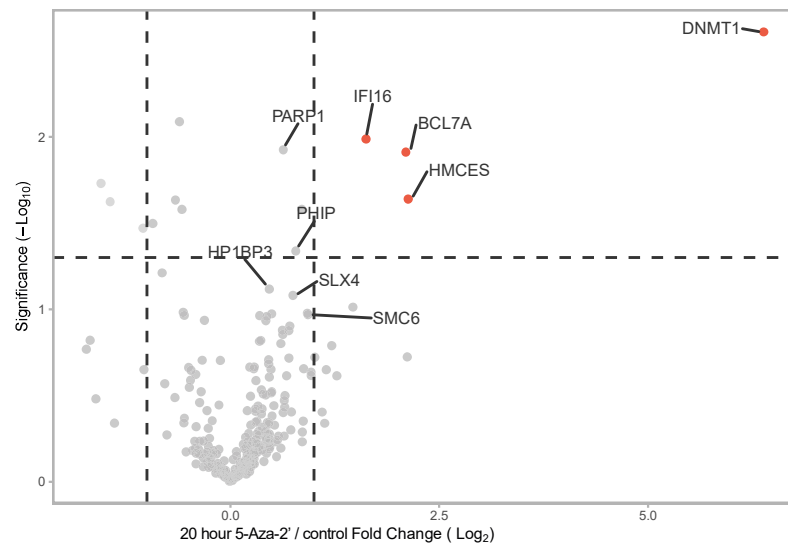

**Supplementary Figure 2** 5-Aza-2' treatment induces SUMOylation of DNA damage response factors in Namalwa cells. **A & B** Volcano plots of all identified SUMOylated proteins in Namalwa cells upon 4 and 20 hour of 5-Aza-2' treatment (1  $\mu$ M) compared to control. His10-SUMO2 conjugated were enriched via Ni-NTA pulldown of His10-SUMO2, followed by trypsin digestion and LFQ mass spectrometry. Peptides were identified by LC-MS/MS. Dashed lines visualize cut off at a foldchange of two ( $\log_2=1$ ) and *p-value* of 0.05 ( $-\log_{10}=1.3$ ) (n=4).



**Supplementary Figure 3** No correlation for MYC and p53 protein expression in sensitivity towards 5-Aza-2' and/or TAK981 treatment within the B cell lymphoma panel. **A** Burkitt Lymphoma cell line P493-6, with doxycycline-inducible (0.1 µg/mL) knockdown of MYC was treated with TAK981 at a dose range of 0.1 – 100 nM. Subsequently, cell viability was measured after 4 days with PrestoBlue. Viability is depicted as ratio to control. **B** P493-6 treated with and without 0.1 µg/mL doxycycline for knock down of MYC, was also treated with 250 nM TAK981 for 24h as indicated. DNA was stained with Propidium Iodide and DNA content was measured with flowcytometry. The graph represents % of cells per cell cycle stage. **C** MYC expression levels in P493-6 with and without doxycycline (0.1 µg/mL) from S3A & B were evaluated via immune blotting. **D** IC50 values for 5-Aza-2' (Figure 4B & C), TAK981 (Figure 4A & C) and excess overbliss percentage (Figure 4D & E) were plotted to compare MYC translocated cell lines versus non-mutated cell lines. Differences were calculated with Two-sided t-tests, performed in Graphpad Prism. **E** Comparison of ABC DLBCL versus GBC DLBCL for sensitivity towards IC50 values for 5-Aza-2' (Figure 4B & C), TAK981 (Figure 4A & C) and excess overbliss percentage (Figure 4D & E). Differences were calculated with Two-sided t-tests performed in Graphpad Prism. **F** IC50 values for 5-Aza-2' (Figure 4B & C), TAK981 (Figure 4A & C) and excess overbliss percentage (Figure 4D & E) were plotted to compare sensitivity related to p53 mutational status. Differences were calculated with Two-sided t-tests, performed in Graphpad Prism. **G** Correlation plots of ten lymphoma cell lines and their IC50 values for either TAK981 dose response (Figure 4A & C), 5-Aza-2' dose response (Figure 4B & C) or excess overbliss (Figure 4D & E) versus protein expression quantified from Figure 4F. Linear regression analysis was performed.

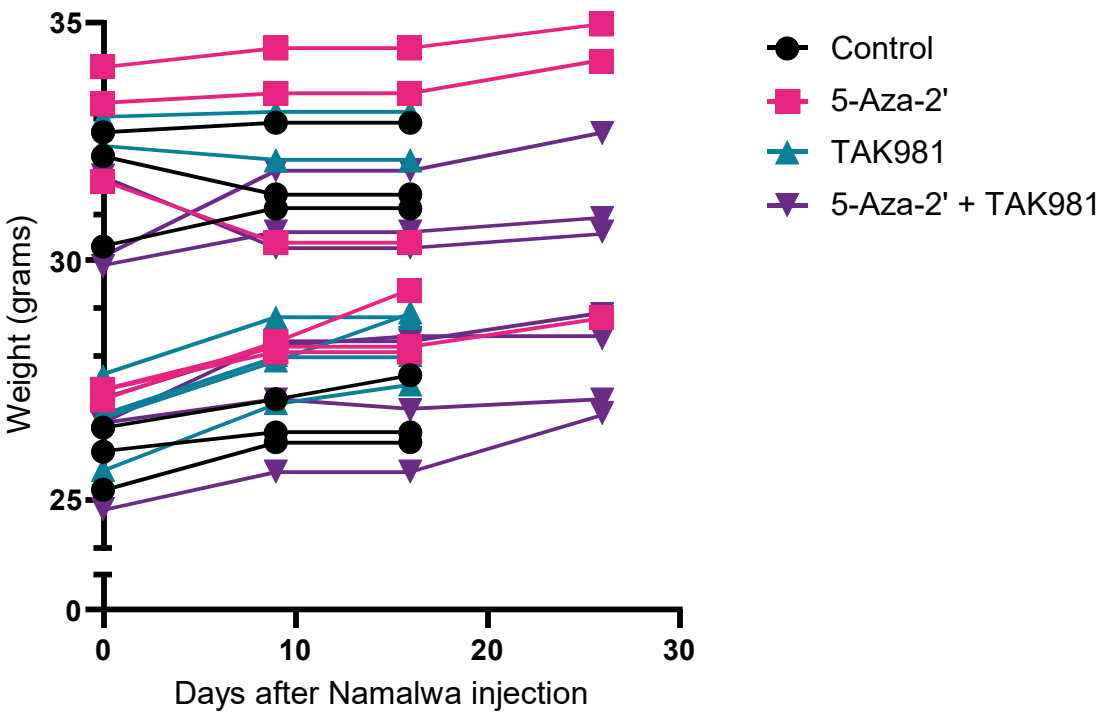



**Supplementary Figure 4** Mouse weight does not change upon treatment with 5-Aza-2' and/or TAK981. Mouse weight in grams for data presented in Figure 5. Mice were weighed on day 0 of tumor injection and on days 8, 16 and 26 post tumor injection. Mice were treated with compounds on day 8 post tumor injection, followed by bi-weekly injections. All mice were plotted individually.
